# Supplementary material
Source: PubMed Central journal article supplement (PMC3294436)
Supplement: supp_139.7.1336_DEV077099FigS2.pdf [file supp_139.7.1336_DEV077099FigS2.pdf]

Signal peptide.....|NH2-term.....|CTDC-like.....CTDC-1.....  
 Ddis PdiA MAKIIISLILLLSLFSSFSYGAYN-CNKLNCSKNTKCRFFSCTSVVGCYYTDKCTSP--DLCHNSACNAS  
 DPU\_43435 -MKLIITLLIIS-LIAFVNGSYN-CAKLSQCG-TDKCKTYSCTSYYGCTSTDCKCVT---DMCNVASCNAA  
 DPU\_25174 MNKLILSFVIIAFLISCTQATYN-CKKLNCG-TDKCKTYSCTSYYGCTSTDCKCVT---DMCNVASCNAA  
 DDB\_G02803 -MKSIIILSFILSIISFSNGTIVKCTSASCSLNNNCVNHVCNPRAGCYGIDKCVRI--DACHIVSCDLN  
 DDB\_G02876 MTKILYLIYLYLTLTIVKGAPLYN-CKKLNCSMNTNCKVFGCSEPMFGCFETSKCPQSNVDICHTNHCDEN  
 DDB\_G02911 -----MNTNCKIFGCSPIN-----VDICHTNHCDEN  
 DDB\_G02910 -----MKIKREDIEKHIDNDCQYIQIIN-----VDICHTNHCDEN  
 . \* \* \* : \* :

.....|CTDC-2.....|.....CTDC-3.....  
 Ddis PdiA TGNCTLTTISCNDDNPCTDDFCHPGYGCYSVPNSCDPGVICQQNCNDNDPCTYDFCDALNICRHS--ET  
 DPU\_43435 TGNCTISPISCNDDGNPCTDDFCHPGYGCYSVPNSCDPAVVCQNNCNDNNKCTNDFCDPNNNCFHETPTIP  
 DPU\_25174 TGNCTITPLKDDGNPCTDDFCHPGYGCYAVPNACDPAVVCCKNNCNDNNKCTNDFCDGNNICYHESYSNP  
 DDB\_G02803 NGSCINTKANCDDGDPCTDDFCHNGYGCFSLPNNKHPSVICQKNCNDNNPCTDDFCDFTNTCQHT--LKN  
 DDB\_G02876 TGSCYQIADTCNDGNNTIDSCGPYGCVNTPVNPPEPTQSCEQKNCNDNNPCTVDFCDFRGDCYHY--ETR  
 DDB\_G02911 TGSCYQIADTCNDGNFNTIDSCGPYGCVNAPVNPPEPTQS-----YPCTVDFCDFRGYCYHY--ETR  
 DDB\_G02910 TRSCYQIADTCNDGNNTIVVV-----VHMVVS--THQS-----CTVDFCDFRGYCYHY--ETR  
 . . \* . : \* . : \* \* \* \* \* . \* \*

...|CTDC-4.....|CTDC-5.....|CTDC-like.....  
 Ddis PdiA CNDGDACTLNTCG-VNGCNFTKISCDNDPCTADYCYSTLYGCEHEPIECSIKVPCNIDSDCNRRNGCETF  
 DPU\_43435 CQDFNACTVDSQDPINGCSNTPLSRDDNDPCTADYCHIIYGCYHEPIECSIKVPCNIDSDCNRRNGCETF  
 DPU\_25174 CQDFNACTVDSQDPINGCSNTPLSRDDNDPCTADYCHIIYGCYHEPIECSIKVPCNIDSDCNRRNGCETF  
 DDB\_G02803 CEDNDFCTIDSCG-PNGCVHTNISCDNDPCTSDFCSIMYGCYHEQIECSIKVPCSTDIENRYNLCETY  
 DDB\_G02876 CSDYDACTLDTCG-EKGCEYRPMNCDDNNPCTADFCSIMYGCYHEPIECSIKVPCRTDSQCNRNFCETY  
 DDB\_G02911 CSDYDACSLDTCG-EKG-----YPCTADFCSIMYGCYHNPIEFSVKVPCSTDSQCNRN-----  
 DDB\_G02910 CSDYDACTLDTCG-EKG-----YPCTADFCSIMYGCYHKPIECSVKVPCSTDSQCNRN-----  
 \* . \* : \* : : \* . : \* \* \* \* \* : \* \* \* \* \* : \* \* \* \* \* : \* \* \*

.....|CTDC-like.....  
 Ddis PdiA TCNLSNTNTCDYYAKNCGGWPCINNQCTTGSISN-----  
 DPU\_43435 TCDLTSNTCDYYAKNCNGNPCINNQCTTGSITN-----  
 DPU\_25174 TCDLTSNTCDYYAKNCNGFPCINNECTTGSISN-----  
 DDB\_G02803 TCDLISNICKYSTKFCNGFPCINNECMTGVIYN-----  
 DDB\_G02876 SCDLSSNICDYTRDCGGNPCINNECRTGTITN-----  
 DDB\_G02911 -----TCDYYDRDRGGNPCINNEWRTGTITNYIIIIIIII  
 DDB\_G02910 -----TYDYYGRDRGGSPCINNEWRTGTITN-----  
 . \* : . \* \* \* \* \* : \* \* \* \*
