# Supplementary material
Source: PubMed Central journal article supplement (PMC3294436)
Supplement: supp_139.7.1336_DEV077099TableS1.pdf [file supp_139.7.1336_DEV077099TableS1.pdf]

**Table S1. Oligonucleotide primers**

| <b>Primer</b> | <b>Amino acids</b> | <b>DNA sequence</b>                                                                             |
|---------------|--------------------|-------------------------------------------------------------------------------------------------|
| PDEF1         | LGHSHL/FDHV        | 5'-CCTCGGTCACAGTCATYTNAYCAAYGT-3'                                                               |
| PDER1         | MFGHLRPR           | 5'-GGTCTTGGACGGAGRTGNCCRAACAT-3'                                                                |
| PDERN1        | FS/C/WDTGVPS       | 5'-GGATGGAACACCAGTRTCNCWRAA-3'                                                                  |
| PdsA-51A      | FSDTGV             | 5'-TTYTCNGAYACNNGNGTNCC-3'                                                                      |
| PdsA-51B      | FSDTGV             | 5'-TTYAGYGAYACNNGNGTNCC-3'                                                                      |
| PdsA-3E       | PEQGEPI            | 5'-ATIGGNWCNCCYTGYTCNGG-3'                                                                      |
| PdsA-3N       | PNQGV/D/EI         | 5'-ATIGGNWCNCCYTGRRTNNGG-3'                                                                     |
| PdsA-32       | IPNQGD             | 5'-GGRTCNCCTYGRRTNNGDAT-3'                                                                      |
| Dmin PdsAEx5' |                    | 5'-CCGGATCCAAATCGACACTTAACCTTTTCAAGATAATTATAAT-TATTATCCTCATAAAATCAAATTTCAACAAATGAGACAGCTGATC-3' |
| Dmin PdsAEx3' |                    | 5'-CCCCTCGAGTTATATACAAATTGGTTCACCTTGTTTCAGG-3'                                                  |
| PdsA-53Xh     |                    | CCGCTCGAGCACCATCACAAAACCCAAGTC                                                                  |
| PdsA-33H      |                    | CCCAAGCTTAAGGAAAACCAACTGAGAC                                                                    |
| PdsA-52B      |                    | CGGGATCCAACCTGGAATCAACGTAG                                                                      |
| PdsA-32S      |                    | CGAGCTCGTACAAACGATGCTTGTAACC                                                                    |
| PdsA-P51X     |                    | GCTCTAGAGGTGAATGTTCACTCATCAGGGCACACT                                                            |
| PdsA-P52X     |                    | GCTCTAGAGGTTTACTAAATGTGTCAGCCTGACTTTG                                                           |
| PdsA-P31B     |                    | CGGGATCCAAGTCATTGGAATACATATTATATGG                                                              |
| PdsA-P32B     |                    | CGGGATCCTTAATACATTGGTTAGTTGATACATGG                                                             |
| PdsA-R54      |                    | CCCATTGAAGGTGGTCTGTTAGG                                                                         |
| PdsA-R33      |                    | CCACTTGGTACACCAGTATCAGAG                                                                        |
| PdsA-R53      |                    | GACCAAGAAGGGTTCCAACGTCTTC                                                                       |
| PdsA-R34      |                    | GCCGATGGTGGCAAGTAATCTTCTG                                                                       |
| PdsA-R56      |                    | CCATCACGAGCAAGTACCAG                                                                            |
| PdsA-R36      |                    | AGGGGAAGGATAGGCAGTAG                                                                            |
| PdsA-R55      |                    | AACACTCCACAGCCCTCACA                                                                            |
| PdsA-R38      |                    | TGGCGAAGCAGGATAAGGGTAAG                                                                         |
| PdsA-R37      |                    | GTTTGGTGAGTATGGCGAAGCAG                                                                         |
